# Supplementary material for: The Effect of Lactobacillus plantarum ATCC 8014 and Lactobacillus acidophilus NCFM Fermentation on Antioxidant Properties of Selected in Vitro Sprout Culture of Orthosiphon aristatus (Java Tea) as a Model Study
Source: MDPI journal article supplement (doi:10.3390/antiox1010004), 2012-09-26
Supplement: s1 [file s1]

## Supplementary Information

# The Effect of *Lactobacillus plantarum* ATCC 8014 and *Lactobacillus acidophilus* NCFM Fermentation on Antioxidant Properties of Selected *in Vitro* Sprout Culture of *Orthosiphon aristatus* (Java Tea) as a Model Study

Dase Hunaefi <sup>1,2,\*</sup>, Divine N. Akumo <sup>3</sup>, Heidi Riedel <sup>1</sup> and Iryna Smetanska <sup>1,4</sup>

<sup>1</sup> Department Method in Food Biotechnology, Institute of Food Technology and Food Chemistry, Berlin University of Technology, Königin-Luise Str. 22, 14195 Berlin, Germany; E-Mails: heidriedel80@yahoo.de (H.R.); smetanska@mailbox.tu-berlin.de (I.S.)

<sup>2</sup> Department of Food Science and Technology, Bogor Agricultural University, Bogor, Indonesia

<sup>3</sup> Institute of Biotechnology, Laboratory of Bioprocess Engineering, Berlin University of Technology Ackerstr. 71-76, 13355 Berlin, Germany; E-Mail: akumo2@yahoo.com

<sup>4</sup> Department of Plant Food Processing, University of Applied Science Weihenstephan-Triesdorf, Steingruber Str. 2, 91746 Weidenbach, Germany

\* Author to whom correspondence should be addressed; E-Mail: dase.hunaefi@mailbox.tu-berlin.de; Tel.: +49-30-314-712-63; Fax: +49-30-832-766-3.

**Tabel S1.** Recent investigations on plant fermentation and its effect on antioxidant properties.

| Plant                                                                                    | Condition of fermentation                                                                                                                                                                                                 | Results                                                                                                                                                                                                             |                                                                                                                                                                                                                                                                |    |                                                                                                                                                                                                                       |
|------------------------------------------------------------------------------------------|---------------------------------------------------------------------------------------------------------------------------------------------------------------------------------------------------------------------------|---------------------------------------------------------------------------------------------------------------------------------------------------------------------------------------------------------------------|----------------------------------------------------------------------------------------------------------------------------------------------------------------------------------------------------------------------------------------------------------------|----|-----------------------------------------------------------------------------------------------------------------------------------------------------------------------------------------------------------------------|
|                                                                                          |                                                                                                                                                                                                                           | Phe                                                                                                                                                                                                                 | FD                                                                                                                                                                                                                                                             | FL | AA                                                                                                                                                                                                                    |
| White cabbage<br>( <i>Brassica oleracea</i> var.<br><i>capitata</i> cv. Megaton)<br>[1]. | <i>L. plantarum</i> CECT 748,<br><i>Leuconostoc mesenteroides</i><br>CECT 219 or a mixed<br>culture of both strains.                                                                                                      | NA                                                                                                                                                                                                                  | NA                                                                                                                                                                                                                                                             | NA | Oxygen radical<br>absorbance capacity<br>(ORAC) values<br>(up to 2-fold) and NO<br>production inhibitory<br>potency (up to 2.6-fold).                                                                                 |
| Oats ( <i>Avena sativa</i> L.)<br>[2]                                                    | SSF with <i>A. oryzae</i> var.<br><i>effuses</i> , <i>A. oryzae</i> , and<br><i>A. niger</i> on four subfractions<br>of oats: n-hexane,<br>ethyl acetate, n-butanol,<br>and water with ethanol as<br>solvent extractions. | Increased significantly<br>( $p < 0.05$ ); e.g.<br>oats water sub fraction<br>from $1,580.1 \pm 62.6$ mg<br>GAE/100 g DW<br>(un-fer.) to<br>$3,632.7 \pm 73.1$ mg<br>GAE/100 g DW<br>(fer. with <i>A. oryzae</i> ). | Increased significantly<br>( $p < 0.05$ ); e.g. Oats ethyl<br>acetate sub fraction from<br>$3,714.8 \pm 94.3$ mg of rutin<br>equivalents/100 g DW<br>(un-fer.) to<br>$7,893.1 \pm 397.3$ mg of rutin<br>equivalents/100 g DW<br>(fer. with <i>A. oryzae</i> ). | NA | Increased significantly<br>( $p < 0.05$ ); e.g. Oats<br>ethyl acetate sub fraction<br>$747.5 \pm 14.6$ micromoles<br>of Trolox per gram of<br>DW (un-fer.) to<br>$1,687.9 \pm 40.7$ (fer. with<br><i>A. oryzae</i> ). |

Tabel S1. Cont.

| Plant                                            | Condition of fermentation                                                                                                                                                                                                                                                             | Results                                                                                                                                                      |                                                                                                                                                               |                                                                                                                      |                                                                                                                                                                                                                       |
|--------------------------------------------------|---------------------------------------------------------------------------------------------------------------------------------------------------------------------------------------------------------------------------------------------------------------------------------------|--------------------------------------------------------------------------------------------------------------------------------------------------------------|---------------------------------------------------------------------------------------------------------------------------------------------------------------|----------------------------------------------------------------------------------------------------------------------|-----------------------------------------------------------------------------------------------------------------------------------------------------------------------------------------------------------------------|
|                                                  |                                                                                                                                                                                                                                                                                       | Phe                                                                                                                                                          | FD                                                                                                                                                            | FL                                                                                                                   | AA                                                                                                                                                                                                                    |
| Soybean [3]                                      | The steamed soybeans were let stand for 1 h at 37 °C to cool down. After, the cooked soybeans was inoculated with 5% (w/w) strain <i>Bacillus subtilis</i> CS90 ( $1.43 \times 10^7$ cfu/mL) and fermented for 60 h at 37 °C in incubator and sampled at 0, 12, 24, 36, 48, and 60 h. | 253 (0 h) increased to 9,414 mg/kg at the end of fermentation (60 h).                                                                                        | Increased from 53.43mg/kg (0 h) to 67.76 mg/kg (12 h)– 73.39 mg/kg (24 h) – 94.32 mg/kg (36 h) – 105.30 mg/kg (48 h) – 111.98 mg/kg (60 h).                   | Total flavonols increased (data divided into different type flavonols) although flavanol gallates contents decreased | The level of DPPH radical scavenging activity increased from 53.6 to 93.9% by 60 h.                                                                                                                                   |
| <i>Anoectochilus formosanus</i> Hayata [4]       | $5 \times 10^6$ cfu/mL <i>L. acidophilus</i> BCRC 17002, <i>Bifidobacterium longum</i> BCRC 14602, <i>L. casei</i> subsp. <i>Casei</i> BCRC 12248 was inoculated into 100 mL vegetable juice.                                                                                         | Increased; e.g. leaf (un-fer.) $6.07 \pm 1.0$ and fermented $14.05 \pm 1.0$ mg/g.                                                                            | NA                                                                                                                                                            | NA                                                                                                                   | It is clearly shown an increase in the detected antioxidant property may owe to the increase of total phenolic compounds.                                                                                             |
| Spirulina ( <i>Arthrospira platensis</i> ) [5]   | <i>B.bifidum</i> , <i>L. casei</i> , <i>B. infantis</i> , <i>B. longum</i> , <i>Lactococcus lactis</i> and <i>L.acidophilus</i> .                                                                                                                                                     | The results of their study indicated that LAB-fermented Spirulina contained more polyphenols.                                                                | NA                                                                                                                                                            | NA                                                                                                                   | The greater quantity of total phenols in fermented samples indicates it possesses greater antioxidant activity.                                                                                                       |
| <i>Graptopetalum paraguayense</i> E. Walther [6] | <i>L. acidophilus</i> BCRC 10695, <i>L. plantarum</i> BCRC 10357 and <i>L. paracasei</i> BCRC 14023.                                                                                                                                                                                  | Increased: e.g. water extract of immature <i>G. paraguayense</i> E. Walther fermentation by <i>L. plantarum</i> BCRC 10357 increased from 92.2 to 111 µg/mg. | Increased: e.g. water extract of immature <i>G. paraguayense</i> E. Walther fermentation by <i>L. plantarum</i> BCRC 10357 increased from 17.2 to 22.9 µg/mg. | NA                                                                                                                   | The level of antioxidants was significantly increased in immature <i>G. paraguayense</i> E. Walther fermented by <i>L. acidophilus</i> BCRC 10695, <i>L. plantarum</i> BCRC 10357 and <i>L. paracasei</i> BCRC 14023. |

Tabel S1. Cont.

| Plant                            | Condition of fermentation                                                                                    |                                                                                                                                                                 | Results                                                                                                                                                                                                                                                                                                                                                                                                                                                                                          |                                                                                                                                                                                                                                                                                                                                                                                                                                                                          |    |                                                                                                                                                                                                                                                                                           |
|----------------------------------|--------------------------------------------------------------------------------------------------------------|-----------------------------------------------------------------------------------------------------------------------------------------------------------------|--------------------------------------------------------------------------------------------------------------------------------------------------------------------------------------------------------------------------------------------------------------------------------------------------------------------------------------------------------------------------------------------------------------------------------------------------------------------------------------------------|--------------------------------------------------------------------------------------------------------------------------------------------------------------------------------------------------------------------------------------------------------------------------------------------------------------------------------------------------------------------------------------------------------------------------------------------------------------------------|----|-------------------------------------------------------------------------------------------------------------------------------------------------------------------------------------------------------------------------------------------------------------------------------------------|
|                                  |                                                                                                              |                                                                                                                                                                 | Phe                                                                                                                                                                                                                                                                                                                                                                                                                                                                                              | FD                                                                                                                                                                                                                                                                                                                                                                                                                                                                       | FL | AA                                                                                                                                                                                                                                                                                        |
| <i>Codonopsis lanceolata</i> [7] | <i>Bifidobacterium longum</i> B6 and <i>L. rhamnosus</i> GG.                                                 |                                                                                                                                                                 | The fermentation process significantly increased the total phenol content of <i>C. lanceolata</i> when compared to the conventional extraction without fermentation. The total phenol content of <i>C. lanceolata</i> was the highest for high pressure assisted extraction from <i>L. rhamnosus</i> fermented (8.45 mg GAE/g), followed by <i>B. longum</i> fermented samples (8.25 mg GAE/g), non-fermented (7.38 mg GAE/g), and conventional extraction without fermentation (6.69 mg GAE/g). | Unlike the total phenols, fermentation decreased the total flavonoids. The lowest flavonoid contents were observed for high pressure assisted extraction of the fermented <i>C. lanceolata</i> with <i>B. longum</i> (0.44 mg RE/g) and <i>L. rhamnosus</i> (0.45 mg RE/g). The high pressure assisted extraction of un-fermented samples showed a maximum flavonoid content of 1.30 mg RE/g, followed by conventional extraction of un-fermented sample (0.78 mg RE/g). | NA | The lowest IC <sub>50</sub> values were 1.25 mg/mL for high pressure assisted extraction of <i>B. longum</i> fermented sample and 1.18 mg/mL for <i>L. rhamnosus</i> fermented sample, indicating that the fermented <i>C. lanceolata</i> extract had the highest antioxidant properties. |
| Peanuts [8]                      | <i>Bifidobacterium longum</i> B17, <i>Lactobacillus casei</i> LC35 and <i>Lactobacillus acidophilus</i> LA51 | Gallic acid, caffeic acid, chlorogenic acid and <i>p</i> -coumaric lactic acid fermentation resulted in a decrease in the content of these four phenolic acids. |                                                                                                                                                                                                                                                                                                                                                                                                                                                                                                  |                                                                                                                                                                                                                                                                                                                                                                                                                                                                          |    | Regardless of the starter organisms used, lactic acid fermentation could highly improve the DPPH radical-scavenging activity of PF (Peanut Flour). For example, at 2 mg/mL, the extract from FPF (Fermented Peanut Flour) showed 54.1 to 85.6% scavenging activity on DPPH radicals.      |

Phe = total phenolics; FD = total flavonoids; FL = total flavonols; and AA: antioxidant activity; SSF = solid state fermentations; and LSF = liquid state fermentations.

## References

1. Martinez-Villaluenga, C.; Peñas, E.; Sidro, B.; Ullate, M.; Frias, J.; Vidal-Valverde, C. White cabbage fermentation improves ascorbigen content, antioxidant and nitric oxide production inhibitory activity in LPS-induced macrophages. *LWT-Food Sci. Technol.* **2012**, *46*, 77–83.

2. Cai, S.; Wang, O.; Wu, W.; Zhu, S.; Zhou, F.; Ji, B.; Gao, F.; Zhang, D.; Liu, J.; Cheng, Q. Comparative study of the effects of solid-state fermentation with three filamentous fungi on the Total Phenolics Content (TPC), flavonoids, and antioxidant activities of subfractions from Oats (*Avena sativa* L.). *J. Agr. Food Chem.* **2011**, *60*, 507–513.
3. Cho, K.M.; Lee, J.H.; Yun, H.D.; Ahn, B.Y.; Kim, H.; Seo, W.T. Changes of phytochemical constituents (isoflavones, flavanols, and phenolic acids) during cheonggukjang soybeans fermentation using potential probiotics *Bacillus subtilis* CS90. *J. Food Compos. Anal.* **2011**, *24*, 402–410.
4. Ng, C.-C.; Wang, C.-Y.; Wang, Y.-P.; Tzeng, W.-S.; Shyu, Y.-T. Lactic acid bacterial fermentation on the production of functional antioxidant herbal *Anoectochilus formosanus* Hayata. *J. Biosci. Bioeng.* **2011**, *111*, 289–293.
5. Liu, J.-G.; Hou, C.-W.; Lee, S.-Y.; Chuang, Y.; Lin, C.-C. Antioxidant effects and UVB protective activity of *Spirulina* (*Arthrospira platensis*) products fermented with lactic acid bacteria. *Process Biochem.* **2011**, *46*, 1405–1410.
6. Wu, S.-C.; Su, Y.-S.; Cheng, H.-Y. Antioxidant properties of *Lactobacillus*-fermented and non-fermented *Graptopetalum paraguayense* E. Walther at different stages of maturity. *Food Chem.* **2011**, *129*, 804–809.
7. He, X.; Zou, Y.; Yoon, W.-B.; Park, S.-J.; Park, D.-S.; Ahn, J. Effects of probiotic fermentation on the enhancement of biological and pharmacological activities of *Codonopsis lanceolata* extracted by high pressure treatment. *J. Biosci. Bioeng.* **2011**, *112*, 188–193.
8. Wang, N.-F.; Yan, Z.; Li, C.-Y.; Jiang, N.; Liu, H.-J. Antioxidant activity of peanut flour fermented with Lactic Acid Bacteria. *J. Food Biochem.* **2011**, *35*, 1514–1521.

© 2012 by the authors; licensee MDPI, Basel, Switzerland. This article is an open access article distributed under the terms and conditions of the Creative Commons Attribution license (<http://creativecommons.org/licenses/by/3.0/>).
